1 **Similar gut bacterial microbiota in two fruit-feeding moth pests**  
2 **collected from different host species and locations**

3 Qiang Gong<sup>1,3,4,#</sup>, Li-Jun Cao<sup>1,#</sup>, Jin-Cui Chen<sup>1</sup>, Ya-Jun Gong<sup>1</sup>, De-Qiang Pu<sup>4</sup>, Qiong Huang<sup>3</sup>,  
4 Ary Anthony Hoffmann<sup>2</sup>, Shu-Jun Wei<sup>1,\*</sup>

5

6 1. Institute of Plant and Environmental Protection, Beijing Academy of Agricultural and  
7 Forestry Sciences, 9 Shuguanghuayuan Middle Road, Haidian District, Beijing 100097, China

8 2. Pest and Environmental Adaptation Research Group, School of BioSciences, Bio21  
9 Institute, University of Melbourne, Parkville, Victoria, Australia

10 3. College of Forestry, Sichuan Agricultural University, Wenjiang, Sichuan 611130, China

11 4. Institute of Plant Protection, Sichuan Academy of Agricultural Sciences, Chengdu 610066,  
12 China

13

14 # these authors contributed equally.

15

16 \* **Corresponding author:** Shu-Jun Wei, Institute of Plant and Environmental Protection,  
17 Beijing Academy of Agricultural and Forestry Sciences, 9 Shuguanghuayuan Middle Road,  
18 Haidian District, Beijing 100097, China; Tel: +86 10 51503439; E-mail: shujun268@163.com

19

20 **Running title:** Gut microbiota in two co-occurring fruit moths

21

## 22 Abstract

23 Numerous gut microbes are associated with insects, but their composition remains largely  
24 unknown for many insect groups, along with factors influencing their composition. Here, we  
25 compared gut bacterial microbiota of two co-occurring agricultural pests, the peach fruit  
26 moth (PFM) and the oriental fruit moth (OFM), collected from different orchards and host  
27 plant species. Gut microbiota of both species was mainly composed of bacteria from  
28 Proteobacteria, followed by Firmicutes. The two species shared bacteria from the genera  
29 *Pseudomonas*, *Gluconobacter*, *Acetobacter*, and *Pantoea*, although endosymbiotic  
30 *Wolbachia* was the most abundant genus in PFM and *Lactobacillus* was the most abundant  
31 in OFM. PFM tended to have lower diversity and richness of gut microbiota than OFM;  
32 however, only some of the comparisons were statistically significant. Orchards can influence  
33 gut microbiota in terms of richness, particularly for PFM, but not so much for diversity  
34 parameters. Functional prediction of gut microbiota showed that the top pathways are  
35 amino acid metabolism, translation, and membrane transport in both species, but their  
36 abundance varied between the two moth species. These results show that two fruit moths  
37 share many features of gut microbiota, and the bacterial species are relatively stable within  
38 moth species even when they use different host plants. Our study suggests that fruit-feeding  
39 behavior may play a role in shaping gut microbiota of the two fruit moths, which may  
40 provide microbial targets for pest control.

41

## 42 **Importance**

43 Understanding the associated microbes with insects can point to new targets for pest control.

44 Here we compared bacterial community in the gut of two co-occurring agricultural pests, the

45 peach fruit moth (PFM) and the oriental fruit moth (OFM), collected from different orchards

46 and host plant species. We found that the bacterial genera *Pseudomonas*, *Gluconobacter*,

47 *Acetobacter*, and *Pantoea* are abundant and shared in two moths. The composition of the

48 bacterial species is relatively stable within moth species even when they use different host

49 plants, indicating that the gut microbiota community in the PFM and OFM is likely to be

50 related to their fruit-feeding behavior. The findings have implications for developing novel

51 pest control approaches by targeting gut microbes associated with the two moths.

52 **Keywords:** *Carposina sasakii*; *Grapholita molesta*; gut microbiome; host; orchard; *Wolbachia*;

53 endosymbiont

54

## 55 Introduction

56 Many microorganisms have become adapted to their insect hosts, forming close mutualistic  
57 relationships (1, 2). These microbes play important roles for their hosts, such as in the  
58 digestion and nutrient absorption of host food, protection against pathogens, and  
59 enhancement of immunity (3-5). The study of insect microorganisms can point to new  
60 approaches for the control of agricultural pests and human disease vectors as well as  
61 increasing the value of economically important insects, particularly by modifying the  
62 symbiotic relationship between symbionts and their hosts (6, 7).

63 The community of microorganisms living in insects can be affected by many  
64 environmental factors (1, 8, 9). In particular, gut bacteria of different insects can vary greatly  
65 in number, composition, distribution, and function for species adapted to different hosts and  
66 living in different habitats (10). Moreover, there can be a dynamic interaction between  
67 bacteria living in the gut and the environment as indicated by the acquisition and loss of  
68 *Serratia symbiotica* strains in aphids (11)

69 Moths include some of the most damaging agricultural and forest pests from the order  
70 Lepidoptera. Being holometabolous, moths are characterized by different life stages and can  
71 vary in their gut microbiota during development (12-14). Many moths are polyphagous,  
72 having a wide range of diets, which represent one of the factors impacting bacterial  
73 communities in this group (13, 15). However, while moths represent useful model species to  
74 understand the determinants of gut microbiota across life stages (16), there is limited  
75 information on variation in their microbiota.

76 Here we focus on the peach fruit moth (PFM), *Carposina sasakii*, and the oriental fruit

77 moth (OFM), *Grapholita molesta*, common agricultural moth pests damaging many  
78 economically important fruit crops, such as apple, pear, and peach (17-20). Larvae of both  
79 these species bore into and feed on fruit, while OFM can also bore into tree shoots prior to  
80 pupation. These species usually co-occur in the same orchard and sometimes on the same  
81 fruit (21-23). The concealed lifestyle and wide range of host plant species used by these  
82 species make them useful to understand factors affecting their gut microbiota. Previous  
83 studies found that larvae of these two moths harbor a high diversity and richness of bacteria  
84 (24, 25), but it is not yet clear the two species are more likely to share the same gut  
85 microbores when they live in the same orchard and on the same host plant species.

86 We examined gut bacterial microbiota in co-occurring PFM and OFM collected from the  
87 same host plant species, with the microbiota characterized using the V3-V4 variable region  
88 of the 16S rRNA gene. We aimed to examine the relative contribution of moth species, host  
89 plant, and other factors related to variation among orchards to microbial composition.

## 90 **Results**

### 91 *Community composition of the gut microbiota in PFM and OFM*

92 The average number of sequencing reads for each sample was 4927 after filtering (**Table S1**).  
93 Rarefaction curves from both the original sequencing data sets and randomly subsampled  
94 data sets showed that the curves of all samples tended to be flat, indicating that the amount  
95 of sequencing data is enough to reflect most of the microbial diversity information in the  
96 samples (**Fig. S1**). In total, 294 OTU were clustered, attributed to 13 phyla and 176 genera  
97 and 234 species for both hosts, among which 234 OTUs belonging to 203 species and 284  
98 OTUs belonging to 228 species were identified for PFM and OFM respectively (**Table S2**).

99 At the phylum level, OTUs in both species were mainly attributed to Proteobacteria  
100 (98.4% in PFM, 89.2% in OFM), followed by Firmicutes (1.06% in PFM, 8.87% in OFM) (**Fig.**  
101 **1a**). At the genus level, OTUs of PFM were mainly annotated to *Wolbachia* (62.06%),  
102 *Pseudomonas* (19.09%), *Gluconobacter* (6.98%), *Acetobacter* (4.05%), and *Pantoea* (3.59%),  
103 while OTUs of OFM were mainly annotated to *Pseudomonas* (49.96%), *Gluconobacter*  
104 (12.53%), *Pantoea* (10.70%), *Lactobacillus* (7.65%), *Acetobacter* (6.61%) (**Fig. 1b** and **Fig. S2**).  
105 Similar patterns were found at the species level where these could be identified (**Fig. 1c**,  
106 **Table S3**).

107 The core bacterial community at the genus level for each species was identified by  
108 comparing individuals from different orchards (**Table S4**). For PFM, 24 core genera were  
109 identified from the four orchards sampled (**Fig. 2a**), the most common of which were  
110 *Wolbachia* (67.07%), followed by *Pseudomonas* (20.63%), *Gluconobacter* (7.54%) and  
111 *Pantoea* (3.88%) (**Fig. 2b**); for OFM, 33 core genera were identified from five orchards (**Fig.**  
112 **2c**), the most common of which were *Pseudomonas* (59.96%), followed by *Gluconobacter*  
113 (15.03%), *Pantoea* (12.84%), and *Lactobacillus* (9.18%) (**Fig. 2d**).

114 In summary, Proteobacteria was the most abundant phylum for both host species.  
115 There were many common bacteria from the genus *Pseudomonas*, *Gluconobacter*,  
116 *Acetobacter* and *Pantoea*, although in PFM *Wolbachia* was the most abundant genus  
117 followed by *Pseudomonas*. *Pseudomonas* was the most abundant genus in OFM, and  
118 *Lactobacillus* and *Dickeya* were abundant in OFM but not in found in PFM (**Figs. 1d, 2b, 2d**).

### 119 **Comparison on gut microbiota between PFM and OFM**

120 When gut bacterial microbiota was compared between all samples of PFM and OFM, in

121 terms of alpha diversity, there was no significant difference in OTU richness between PFM  
122 and OFM ( $P_{ace} = 0.57$ ,  $P_{chao} = 0.121$ ,  $P_{sobs} = 0.014$ ) (**Fig. 3a-b, Tables S5, and S6**) but  
123 significantly lower diversity in PFM than in OFM ( $P_{shannon} = 0.002$ ,  $P_{simpson} = 0.004$ ) (**Fig. 3c-d,**  
124 **Tables S5 and S6**). In terms of beta diversity, PFM and OFM individuals divided into two  
125 groups in the PCoA analysis, although outlier samples were identified (**Fig. 3e, Table S7**).

126 We then compared gut bacterial microbiota between three pairs of PFM and OFM  
127 populations collected from the same host species and the same orchard. In terms of alpha  
128 diversity, OFM usually had higher richness and diversity except for one paired richness  
129 comparison collected from apple (**Fig. S3a, Table S5**). For pear, patterns were consistent, but  
130 only one of the three comparisons was statistically different in diversity (**Fig. S3h**). In terms  
131 of beta diversity, individuals of PFM and OFM from the same habitat could be clustered into  
132 different groups in the PCoA analysis (**Fig. S3c, f, i**), with individuals collected from pear  
133 showing the clearest separation (**Fig. S3i, Table S7**).

#### 134 *Influence of orchard on gut microbiota within species*

135 First, we compared the gut microbiota of the same insect species collected from different  
136 host plant species and different orchards to examine the effect of orchard but relaxing the  
137 host plant species. PFM individuals from four orchards and OFM individuals from five  
138 orchards were analyzed. For PFM, four of six pairs of orchard comparisons had significant  
139 differences in richness, while one of the six pairs showed difference in diversity (**Fig. S4**). For  
140 OFM, two of 10 pairs of orchard comparisons were significantly different for richness, but  
141 none were significant for diversity (**Fig. S5**). For overall comparison, there was no significant  
142 difference in any measure of richness or diversity in either species ( $\chi^2 = 18/18/18/14.36/18$ ,

143  $df = 18/18/18/14/18$ ,  $p > 0.4231$  for Ace, Shannon, Simpson, Sobs and Chao in PFM;  $\chi^2 = 24$ ,  
144  $df = 24/24/24/23/24$ ,  $p > 0.4038$  for Ace, Shannon, Simpson, Sobs and Chao in OFM).  
145 Second, we compared the gut microbiota of the same species and host plant from different  
146 orchards to test the effect of the orchard by fixing the host plant. Two pairs of PFMs from  
147 pear and apple and two pairs of OFM from pear and peach shoot hosts were used for  
148 analysis. In terms of alpha diversity (Ace), a significant difference in richness was found in  
149 both paired PFM comparisons (**Figs. S6a, S6g**) and one of the two OFM comparisons (**Fig.**  
150 **S6d**), while a significant difference in Shannon's index was found in one of the two PFM  
151 comparisons (**Fig. S6b**) but not in the OFM comparisons (**Figs. S6h, S6k**). In terms of beta  
152 diversity, individuals from different orchards of the same species were not clearly separated  
153 in the PCoA analyses (**Fig. 5, Figs. S6c, f, i, l**).

154 While these results suggest that orchard can affect the composition of gut microbiota in  
155 PFM and OFM, the effect is relatively small, particularly as shown in the beta diversity  
156 analysis. Orchard had a higher impact on richness than on diversity, and PFM tended to vary  
157 more among orchards with the same host than OFM.

### 158 *Function prediction of gut microbiota*

159 At level 1, functions of the gut microbiota were mainly annotated to pathways of  
160 metabolism, genetic information processing, environmental information processing, and  
161 cellular processing. At level 2, the top pathways were amino acid metabolism, translation  
162 and membrane transport (**Table 2**). It can be seen in the COG (Clusters of Orthologous  
163 Groups) function annotation that the functions of gut microbiota of OFM and PFM were  
164 annotated to the same pathway, but the abundance of the same pathway was different (**Fig.**



165 **6a).** Among the top 10 functions in KEGG (Kyoto Encyclopedia of Genes and Genomes)  
166 annotations pathway level 3, there was a significant difference between OFM and PFM ( $p <$   
167 0.0001). ABC transporters and two-component system were significantly higher in OFM than  
168 PFM, and the remaining eight were higher in PFM than OFM (**Fig. 6b**).

## 169 **Discussion**

### 170 *Comparison of gut microbiota from two fruit borers*

171 In this study, we found that the gut microbiota of PFM and OFM was dominated by  
172 Proteobacteria and Firmicutes, which is similar to the situation found in Y. Liu et al. (25) and  
173 Y. Li et al. (24), and in other lepidopterans such as *Lymantria dispar*, *Helicoverpa armigera*,  
174 and *Bombyx mori* (26-29). However, there was a difference between PFM and OFM and  
175 other lepidopterans at the genus level. OTUs from both PFM and OFM was dominated by  
176 *Pseudomonas*, *Gluconobacter*, *Acetobacter*, and *Pantoea*. In contrast, in silkworms,  
177 *Aureimonas*, *Methylobacterium*, *Rhizobium*, *Sphingomonas*, *Propionibacterium*,  
178 *Pseudomonas*, and *Microbacterium* were the most common genera (29). The results suggest  
179 that PFM and OFM gut microbes had a similar composition, but they are different from  
180 those of the *Bombyx mori*, which has a different diet. Our results support the notion that  
181 dietary adaptation has led to different intestinal microorganisms and symbiotic interactions  
182 (30), although more moth species with different hosts (fruit, leaf tissue, and so on) need to  
183 be included in such comparisons.

184 We also found some differences between the two species examined here, where OTUs  
185 of PFM were dominated by *Wolbachia*, and OTUs of OFM were dominated by *Lactobacillus*.  
186 When we focused on the gut microbes of PFM and OFM from the same host and the same

187 orchard, this pattern was also found: *Wolbachia* was unique to PFM, while *Lactobacillus* was  
188 abundant in OFM and rare in PFM. Perhaps this difference in species might generate  
189 phenotypic differences among the species for traits such as pesticide resistance. For instance,  
190 insecticide-treated resistant strains of the diamondback moth *Plutella xylostella* had more  
191 *Lactobacillales* and the less common taxa *Pseudomonadales* and *Xanthomonadales* as well  
192 as fewer *Enterobacteriales* compared with a susceptible strain (31). The OFM microbiota  
193 might contribute to resistance, although living in fruit they would be less affected by  
194 pesticides than *Plutella xylostella* larvae feeding on leaves. The comparison of microbes of  
195 PFM and OFM in three orchards showed that there was no large difference in microbial  
196 richness and diversity between PFM and OFM, but the PCA analysis highlighted differences  
197 in species composition, with host type clearly being a major determinant of gut  
198 microorganisms.

### 199 *Influence of orchard and host species on gut microbiota*

200 Microbial communities can vary among host locations, both in terms of community diversity  
201 and community structure (32). In our study, there were differences in microbial richness in  
202 larvae from the same species collected from different orchards with the same type of fruit  
203 (PLPR/PKPR, PDAE/PGAE, OLPR/OKPR, Table S5), which suggests an impact of orchard  
204 habitat on microbial richness. Differences in microbial diversity have also been noted in  
205 studies on other insects, such as in comparisons of *Drosophila* between indoor and wild  
206 environments (33). However, the gut microorganisms in neither PFM nor OFM could be  
207 clearly separated by orchard or fruit type in the PCoA analysis, suggesting that host species  
208 rather than location plays a more important role in microbial community composition.

## 209 *Wolbachia* in PFM

210 *Wolbachia* is an intracellular endosymbiont rather than a gut bacterium, but it can be found  
211 in the gut wall of species (34). The role of *Wolbachia* in PFM is unclear; it is common in  
212 Lepidoptera (35) where its effects have mostly not been characterized in species although in  
213 Lepidoptera it can cause a variety of effects on host reproduction including cytoplasmic  
214 incompatibility, feminization and male-killing (36-38) and increases the susceptibility  
215 of its host to baculovirus (39). These effects have not yet been investigated in PFM and  
216 require a comparison of *Wolbachia* infected and uninfected individuals for fitness as well as  
217 crosses to establish reproductive effects.

218 Of particular interest from the perspective of the current study is whether *Wolbachia*  
219 might influence the gut microbiota. *Wolbachia* may lead to decreased microbial diversity  
220 due to competitive behavior (40), which may contribute to the lower diversity of gut  
221 microbiota in PFM than that of OFM. In *Drosophila melanogaster*, *Wolbachia* can reduce the  
222 richness of *Acetobacter* (41), but this group was not at a low abundance in PFM. Whether  
223 *Wolbachia* in PFM influences, other microbiota requires a comparison of *Wolbachia* infected  
224 and *Wolbachia* free lines, which might be generated through antibiotic treatment or by  
225 taking advantage of natural polymorphism in infection status within natural populations  
226 (42).

## 227 *Implications for pest management*

228 The insect-associated microbes provide new targets for developing novel pest control  
229 methods (6, 16, 43, 44). The first step to find the potential bacterial targets is to investigate  
230 the bacterial community, its impact on the pests, and its stability. We found that the

231 community of the gut microbiota were relatively stable within moth species in spite of host  
232 fruit differences for microbes such as *Pseudomonas*, *Pantoea*, *Lactobacillus*, *Gluconobacter*,  
233 and *Acetobacter*. Functional analysis showed that three of the ten most abundant functions  
234 were environmental signaling processes, and others involve metabolism, genetic information  
235 processing, and cellular processes. These functional classes suggest that gut bacteria have a  
236 clear interaction with host processes in the intestinal environment. Among the abundant  
237 bacteria taxa, *Pseudomonas brenneri* plays a prominent role in the removal of heavy metals  
238 (45). This species is significantly more abundant in OFM than PFM and may contribute to the  
239 different ratios of ABC transporters and the Two-component system. *Gluconobacter cerinus*  
240 was another species present in PFM and OFM, which may have a beneficial role as in the  
241 case of fruit flies where it can affect reproduction (46). *Pantoea* is a highly diverse genus that  
242 can cause plant diseases and human diseases but also have functions in habitat restoration  
243 and pesticide degradation (47). Functional studies of these bacteria may help to identify  
244 potential targets for developing control methods of these two fruit moths.

245 We also note that the two fruit moths share many gut bacterial taxa. The similar  
246 composition of gut bacterial microbiota indicates functions related to the common biology  
247 of both species, particularly in terms of the fruit-feeding larvae. These larvae bore into fruit  
248 or shoots soon after egg hatching, reducing their likelihood of exposure to environmental  
249 bacteria when compared to the leaf-feeding moths. In the fruit-feeding spotted wing  
250 drosophila, *Drosophila suzukii*, the gut microbiota provides nutrition by providing protein for  
251 their hosts (48). Larvae of fruit moths often feed on immature fruits, which are rich in  
252 compounds such as organic acids and tannins. The tannins are endogenous inhibitors of the

253 growth of numerous species of pests by negatively effecting the metabolism of insects (49).  
254 We found that the most abundant function of the gut microbiota in both species were  
255 metabolic processes. There are examples of gut microbiota in lepidopteran hosts helping to  
256 detoxify host toxins (50, 51), but whether the fruit moths need microbes to help them to  
257 detoxify defensive chemicals is unclear. Nevertheless, the gut microbiota community in the  
258 PFM and OFM is likely to be related to their fruit-feeding behavior, and further tests of such  
259 hypotheses may provide insights into the development of novel control approaches.

## 260 **Materials and methods**

### 261 *Sample collection and DNA extraction*

262 We sampled three pairs of PFM and OFM populations from the same host plant and orchard,  
263 as well as one PFM population from another apple orchard, and two OFM populations from  
264 two peach orchards infesting tree shoots (**Table 2**). We collected potentially infested pears  
265 and apples and peach shoots from the field and kept them in the conditioned laboratory  
266 under  $25 \pm 1$  °C,  $60\% \pm 5\%$  humidity, and a photoperiod of 16 h light: 8 h dark. Fifth instar  
267 larvae were collected when they came out from the collected hosts. Species were identified  
268 by morphology and kept in a clean 1.5 ml tube for 24 hours to clean out the feces by  
269 starvation. Then, larvae were frozen in liquid nitrogen and stored in a -80 °C refrigerator  
270 prior to usage. We examined the gut microbiota of 19 PFM and 25 OFM individuals (**Table 2**).

271 Prior to DNA extraction, larvae were washed three times, with 75% alcohol, and then  
272 washed three times with sterile water. The whole gut tissue was dissected and homogenized  
273 in a 1.5 ml tube by grinding manually. Total DNA was extracted from single samples using the  
274 E.Z.N.A.® Bacterial DNA Kit (Omega Bio-tek, GA, U.S.) according to manufacturer's protocol.

275 The concentration and quality of the extracted DNA were determined by a NanoDrop 2000  
276 UV-vis spectrophotometer (Thermo Scientific, Wilmington, USA) and gel electrophoresis on  
277 1% agarose.

### 278 *16S rRNA gene amplification and sequencing*

279 We used the V3-V4 hypervariable regions of the bacterial 16S ribosomal RNA (rRNA) gene to  
280 examine the gut microbiota of PFM and OFM. A 468-bp target gene segment was amplified  
281 by primer pair of 338F (5'-ACTCCTACGGGAGGCAGCAG-3') and 806R  
282 (5'-GGACTACHVGGGTWTCTAAT-3') (52). For PCR reaction, 20  $\mu$ L of the mixture was prepared,  
283 including 5 x FastPfu reaction buffer, 250  $\mu$ M dNTPs 1 U FastPfu Polymerase (Transgene,  
284 Beijing, China), 200 nM of each prime (Majorbio, Shanghai, China), 1  $\mu$ L of template DNA  
285 and DNA-free water. The PCR reaction involved a single denaturation step at 95 °C for 3 min,  
286 followed by 27 cycles of 95 °C for 30 s, 55 °C for 30 s, 72 °C for 45 s, and finished after a final  
287 extension at 72 °C for 10 min. The PCR products were run on a 2% (w/v) agarose gel and  
288 those with correct size were excised and purified with a AxyPrep DNA gel extraction kit  
289 (Axygen Biosciences, Union City, CA, USA). Illumina Miseq sequencing libraries were  
290 constructed using the TruSeq™ DNA Sample Prep Kit (San Diego, CA, USA) for the purified  
291 16S PCR products, and sequenced on an Illumina MiSeq (San Diego, CA, USA) to obtain  
292 300-bp paired-end reads.

### 293 *Quality control and OTU identification*

294 Raw data from Illumina MiSeq sequencing were demultiplexed to obtain sequencing data for  
295 each sample. The quality of raw data was checked by FASTQC version 0.19.6 (53); low-quality

296 data were trimmed and filtered by Trimmomatic version 0.36 (54). Paired-end reads were  
297 merged by FLASH version 1.2.11 (55) to generate unpaired longer reads with the following  
298 criteria: (i) the reads were truncated at any site receiving an average quality score < 20 over  
299 a 50 bp sliding window; (ii) primers were exactly matched allowing two nucleotide  
300 mismatching, and reads containing ambiguous bases were removed; (iii) only paired-end  
301 reads whose overlap longer than 10 bp were merged.

302 Operational taxonomic units (OTUs) were clustered with a 97% similarity threshold  
303 using UPARSE version 7.0.1090 (56), and chimeric sequences were identified and removed  
304 using UCHIME algorithm in USEARCH version 7.0 (57). The taxonomy of each 16S rRNA gene  
305 sequence was analyzed by a naïve Bayesian classifier of Ribosomal Database Project version  
306 2.11 (58) against the SILVA rRNA database (59). To avoid the influence of sequencing depth  
307 in samples, sequences from difference samples were rarefied to the same depth. Sample  
308 sequence extraction and species screening of OTU were conducted in accordance with the  
309 following conditions: (i) removal of mitochondrial and chloroplast sequences; (ii) retention  
310 of only OTUs with sequence depth greater than or equal to five in at least three samples in  
311 subsequent analyses.

### 312 ***Diversity analysis***

313 For alpha diversity, community richness indexes (sobs, chao, and ace) and community  
314 diversity indexes (Shannon, Simpson, and Pd) were estimated. The software Mothur (60) was  
315 used to calculate the alpha diversity index under different random sampling, and the *ggplot2*  
316 R package was used to draw the rarefaction curves. The Wilcoxon rank-sum test was used to  
317 compare statistical differences between different groups, while the Kruskal-Wallis rank sum

318 test was used for overall comparison to examine the species, host, and orchard effects. In  
319 the beta diversity analysis, principal coordinates analysis (PCoA) was conducted based on a  
320 Bray-Curtis dissimilarity matrix computed from the samples. For group comparisons, a  
321 non-parametric multivariate statistical test, permutational multivariate analysis of variance  
322 (PERMANOVA), was conducted based on the Bray-Curtis dissimilarity matrix, using Qiime  
323 and the R package *vegan* (61).

### 324 **Functional analysis**

325 We used PICRUSt version 1.1.4 (62) to predict the function of the gut microbiota from PFM  
326 and OFM. The OTU abundance table was first normalized by removing the effect of the 16S  
327 rRNA gene copy numbers (GCNs). The COG (Clusters of Orthologous Groups) family  
328 information was obtained according to the Greengene id version gg\_13\_5 (63)  
329 corresponding to each OTU. The description information of each COG and its function  
330 information was parsed based on the eggNOG (evolutionary genealogy of genes:  
331 Non-supervised Orthologous Groups) database v5.0 (64). The 16S rRNA taxonomic lineage  
332 based on the SILVA rRNA database (59) was transformed into the taxonomic lineage of  
333 prokaryotes in the KEGG (Kyoto Encyclopedia of Genes and Genomes) database Release 92.0  
334 (65) through Tax4Fun (66), and the 16S rRNA gene sequence was functionally annotated. A  
335 Wilcoxon rank-sum test was used to compare the statistical difference between OFM and  
336 PFM for the 10 most abundant pathways at level 3.

### 337 **Acknowledgements**

338 Funding for this study was provided jointly by the National Key Research and Development  
339 Program of China (2019YFD1002102), the Beijing Key Laboratory of Environmentally Friendly



340 Pest Management on Northern Fruits (BZ0432) and BAAFS-UOM Joint Laboratory on Pest  
341 Control Research. SJW conceived and designed research. DQP, YJG, JCC and QH collected the  
342 samples. QG and LJC conducted experiments. QG, SJW and LJC analyzed data. QG, SJW and  
343 AAH wrote the manuscript and discussed the results.

## 344 **References**

- 345 1. Shapira M. 2016. Gut microbiotas and host evolution: scaling up symbiosis. *Trends in*  
346 *Ecology and Evolution* 31:539-549.
- 347 2. Dillon R, Dillon V. 2004. The gut bacteria of insects: nonpathogenic interactions. *Annual*  
348 *Reviews of Entomology* 49:71-92.
- 349 3. Engel P, Moran NA. 2013. The gut microbiota of insects—diversity in structure and function.  
350 *FEMS Microbiology Reviews* 37:699-735.
- 351 4. Douglas AE. 2015. Multiorganismal insects: diversity and function of resident  
352 microorganisms. *Annual Review of Entomology* 60:17-34.
- 353 5. Dicke M, Cusumano A, Poelman EH. 2020. Microbial symbionts of parasitoids. *Annual*  
354 *Review Entomology* 65:171-190.
- 355 6. Berasategui A, Shukla S, Salem H, Kaltenpoth M. 2016. Potential applications of insect  
356 symbionts in biotechnology. *Applied Microbiology and Biotechnology*  
357 100:1567-1577.
- 358 7. Walker T, Johnson PH, Moreira LA, Iturbe-Ormaetxe I, Frentiu FD, McMeniman CJ, Leong  
359 YS, Dong Y, Axford J, Kriesner P, Lloyd AL, Ritchie SA, O'Neill SL, Hoffmann AA. 2011.  
360 The wMel *Wolbachia* strain blocks dengue and invades caged *Aedes aegypti*  
361 populations. *Nature* 476:450-U101.
- 362 8. Hansen AK, Moran NA. 2014. The impact of microbial symbionts on host plant utilization  
363 by herbivorous insects. *Molecular Ecology* 23:1473-1496.
- 364 9. Adair KL, Douglas AE. 2017. Making a microbiome: the many determinants of  
365 host-associated microbial community composition. *Current Opinion in Microbiology*  
366 35:23-29.
- 367 10. Priya NG, Ojha A, Kajla MK, Raj A, Rajagopal R. 2012. Host plant induced variation in gut  
368 bacteria of *Helicoverpa armigera*. *PLoS ONE* 7:e30768.
- 369 11. Renoz F, Pons I, Vanderpoorten A, Bataille G, Noel C, Foray V, Pierson V, Hance T. 2019.  
370 Evidence for gut-associated *Serratia symbiotica* in wild aphids and ants provides new  
371 perspectives on the evolution of bacterial mutualism in insects. *Microbial Ecology*  
372 78:159-169.
- 373 12. Mereghetti V, Chouaia B, Limonta L, Locatelli DP, Montagna M. 2019. Evidence for a  
374 conserved microbiota across the different developmental stages of *Plodia*

- 375 *interpunctella*. Insect Science 26:466-478.
- 376 13. Staudacher H, Kaltenpoth M, Breeuwer JA, Menken SB, Heckel DG, Groot AT. 2016.
- 377 Variability of bacterial communities in the moth *Heliothis virescens* indicates
- 378 transient association with the host. PLoS ONE 11:e0154514.
- 379 14. Lin XL, Pan QJ, Tian HG, Douglas AE, Liu TX. 2015. Bacteria abundance and diversity of
- 380 different life stages of *Plutella xylostella* (Lepidoptera: Plutellidae), revealed by
- 381 bacteria culture-dependent and PCR-DGGE methods. Insect Science 22:375-385.
- 382 15. Montagna M, Mereghetti V, Gargari G, Guglielmetti S, Faoro F, Lozzia G, Locatelli D,
- 383 Limonta L. 2016. Evidence of a bacterial core in the stored products pest *Plodia*
- 384 *interpunctella*: the influence of different diets. Environmental Microbiology
- 385 18:4961-4973.
- 386 16. Mereghetti V, Chouaia B, Montagna M. 2017. New insights into the microbiota of moth
- 387 pests. International Journal of Molecular Sciences 18:2450.
- 388 17. Ma G, Tian BL, Zhao F, Wei GS, Hoffmann AA, Ma CS. 2017. Soil moisture conditions
- 389 determine phenology and success of larval escape in the peach fruit moth, *Carposina*
- 390 *sasakii* (Lepidoptera, Carposinidae): Implications for predicting drought effects on a
- 391 diapausing insect. Applied Soil Ecology 110:65-72.
- 392 18. Quan LF, Qiu GS, Zhang HJ, Sun LN, Li YY, Yan WT. 2016. Sublethal concentration of
- 393 beta-cypermethrin influences fecundity and mating behavior of *Carposina sasakii*
- 394 (Lepidoptera: Carposinidae) adults. Journal of Economic Entomology 109:2196-2204.
- 395 19. Rothschild GHL, Vickers RA. 1991. Biology, ecology and control of the oriental fruit moth,
- 396 p 389-412. In van der Geest L, Evenhuis H (ed), World Crop Pests Tortricid pests: their
- 397 biology, natural enemies and control, vol 5. Elsevier, Amsterdam.
- 398 20. Wang YZ, Li BY, Hoffmann AA, Cao LJ, Gong YJ, Song W, Zhu JY, Wei SJ. 2017. Patterns of
- 399 genetic variation among geographic and host-plant associated populations of the
- 400 peach fruit moth *Carposina sasakii* (Lepidoptera: Carposinidae). BMC Evolutionary
- 401 Biology 17:265.
- 402 21. Kwon D, Kwon H, Kim D, Yang C. 2018. Larval species composition and genetic structures
- 403 of *Carposina sasakii*, *Grapholita dimorpha*, and *Grapholita molesta* from Korea.
- 404 Bulletin of entomological research 108:241-252.
- 405 22. Kwon DH, Kim DH, Kim HH, Lee SH, Yang CY. 2017. Genetic diversity and structure in
- 406 apple-infesting pests of *Carposina sasakii*, *Grapholita dimorpha* and *Grapholita*
- 407 *molesta* in Korea. Journal of Asia-Pacific Entomology 20:13-16.
- 408 23. Sarker S, Lim UT. 2019. Development and fecundity performance of *Grapholita molesta*
- 409 and *Grapholita dimorpha* (Lepidoptera: Tortricidae) on different immature fruits.
- 410 PLoS ONE 14:e0217492.
- 411 24. Li Y, Sun L, Tian Z, Haibin H, Zhang H, Guisheng Q, Yan W, Yue Q. 2018. Gut bacterial
- 412 community diversity in *Carposina sasakii* and *Grapholita molesta*. Chinese Journal

- 413 of Applied Ecology 29:293-300.
- 414 25. Liu Y, Shen Z, Yu J, Li Z, Liu X, Xu H. 2020. Comparison of gut bacterial communities and  
415 their associations with host diets in four fruit borers. *Pest Management Science*  
416 76:1353-1362.
- 417 26. Yun JH, Roh SW, Whon TW, Jung MJ, Kim MS, Park DS, Yoon C, Nam YD, Kim YJ, Choi JH,  
418 Kim JY, Shin NR, Kim SH, Lee WJ, Bae JW. 2014. Insect gut bacterial diversity  
419 determined by environmental habitat, diet, developmental stage, and phylogeny of  
420 host. *Applied and Environmental Microbiology* 80:5254-64.
- 421 27. Broderick NA, Raffa KF, Goodman RM, Handelsman J. 2004. Census of the bacterial  
422 community of the gypsy moth larval midgut by using culturing and  
423 culture-independent methods. *Applied and Environmental Microbiology* 70:293-300.
- 424 28. Hui XA, Wei GF, Jia SH, Huang JH, Miao XX, Zhou Z, Zhao LP, Huang YP. 2006. Microbial  
425 communities in the larval midgut of laboratory and field populations of cotton  
426 bollworm (*Helicoverpa armigera*). *Canadian Journal of Microbiology* 52:1085-1092.
- 427 29. Chen B, Du K, Sun C, Vimalanathan A, Liang X, Li Y, Wang B, Lu X, Li L, Shao Y. 2018. Gut  
428 bacterial and fungal communities of the domesticated silkworm (*Bombyx mori*) and  
429 wild mulberry-feeding relatives. *The ISME Journal* 12:2252-2262.
- 430 30. Colman DR, Toolson EC, Takacs-Vesbach CD. 2012. Do diet and taxonomy influence insect  
431 gut bacterial communities? *Molecular Ecology* 21:5124-5137.
- 432 31. Xia XF, Zheng DD, Zhong HZ, Qin BC, Gurr GM, Vasseur L, Lin HL, Bai JL, He WY, You MS.  
433 2013. DNA sequencing reveals the midgut microbiota of diamondback moth, *Plutella*  
434 *xylostella* (L.) and a possible relationship with insecticide resistance. *PLoS ONE*  
435 8:e68852.
- 436 32. Meriweather M, Matthews S, Rio R, Baucom RS. 2013. A 454 survey reveals the  
437 community composition and core microbiome of the common bed bug (*Cimex*  
438 *lectularius*) across an urban landscape. *PLoS ONE* 8:e61465.
- 439 33. Chandler JA, Lang JM, Bhatnagar S, Eisen JA, Kopp A. 2011. Bacterial communities of  
440 diverse *Drosophila* species: ecological context of a host-microbe model system. *PLoS*  
441 *Genetics* 7:e1002272.
- 442 34. Werren JH. 1997. Biology of *Wolbachia*. *Annual Review of Entomology* 42:587-609.
- 443 35. Ahmed MZ, Araujo-Jnr EV, Welch JJ, Kawahara AY. 2015. *Wolbachia* in butterflies and  
444 moths: geographic structure in infection frequency. *Frontiers in Zoology* 12:16.
- 445 36. Kageyama D, Nishimura G, Hoshizaki S, Ishikawa Y. 2002. Feminizing *Wolbachia* in an  
446 insect, *Ostrinia furnacalis* (Lepidoptera: Crambidae). *Heredity* 88:444.
- 447 37. Berc L, Maxin D, Bernhauerová V, Rohr J. 2016. Male-killing bacteria as agents of insect  
448 pest control. *Journal of Applied Ecology* 53:1270-1279.
- 449 38. Hurst GD, Johnson AP, Schulenburg JH, Fuyama Y. 2000. Male-killing *Wolbachia* in  
450 *Drosophila*: a temperature-sensitive trait with a threshold bacterial density. *Genetics*

- 451 156:699-709.
- 452 39. Kaiser W, Huguët E, Casas J, Commin C, Giron D. 2010. Plant green-island phenotype  
453 induced by leaf-miners is mediated by bacterial symbionts. *Proceedings of the Royal*  
454 *Society B-Biological Sciences* 277:2311-2319.
- 455 40. Dittmer J, Bouchon D. 2018. Feminizing *Wolbachia* influence microbiota composition in  
456 the terrestrial isopod *Armadillidium vulgare*. *Scientific Reports* 8:6998.
- 457 41. Simhadri RK, Fast EM, Guo R, Schultz MJ, Vaisman N, Ortiz L, Bybee J, Slatko BE, Frydman  
458 HM. 2017. The gut commensal microbiome of *Drosophila melanogaster* is modified  
459 by the endosymbiont *Wolbachia*. *mSphere* 2:e00287-17.
- 460 42. Shi M, White VL, Schlub T, Eden JS, Hoffmann AA, Holmes EC. 2018. No detectable effect  
461 of *Wolbachia* wMel on the prevalence and abundance of the RNA virome of  
462 *Drosophila melanogaster*. *Proceedings of the Royal Society B-Biological Sciences*  
463 285:1883.
- 464 43. Bosch TJ, Welte CU. 2017. Detoxifying symbionts in agriculturally important pest insects.  
465 *Microbial Biotechnology* 10:531-540.
- 466 44. Itoh H, Tago K, Hayatsu M, Kikuchi Y. 2018. Detoxifying symbiosis: microbe-mediated  
467 detoxification of phytotoxins and pesticides in insects. *Natural Products Reports*  
468 35:434-454.
- 469 45. Banerjee S, Kamila B, Barman S, Joshi SR, Mandal T, Haider G. 2019. Interlining Cr(VI)  
470 remediation mechanism by a novel bacterium *Pseudomonas brenneri* isolated from  
471 coalmine wastewater. *Journal of Environmental Management* 233:271-282.
- 472 46. He MY, Jiang JJ, Cheng DF. 2017. The plant pathogen *Gluconobacter cerinus* strain CDF1 is  
473 beneficial to the fruit fly *Bactrocera dorsalis*. *Amb Express* 7:207.
- 474 47. Walterson AM, Stavriniades J. 2015. *Pantoea*: insights into a highly versatile and diverse  
475 genus within the Enterobacteriaceae. *FEMS Microbiology Reviews* 39:968-984.
- 476 48. Bing X, Gerlach J, Loeb G, Buchon N. 2018. Nutrient-dependent impact of microbes on  
477 *Drosophila suzukii* development. *mBio* 9:e02199-17.
- 478 49. Schultz J. 1989. Tannin-insect interactions. *In* Hemingway RW, Karchesy JJ, Branham SJ  
479 (ed), *Chemistry and Significance of Condensed Tannins*. Springer, Boston, MA.
- 480 50. Ceja-Navarro JA, Vega FE, Karaoz U, Hao Z, Jenkins S, Lim HC, Kosina P, Infante F, Northen  
481 TR, Brodie EL. 2015. Gut microbiota mediate caffeine detoxification in the primary  
482 insect pest of coffee. *Nature Communications* 6:7618.
- 483 51. Vilanova C, Baixeras J, Latorre A, Porcar M. 2016. The generalist inside the specialist: gut  
484 bacterial communities of two insect species feeding on toxic plants are dominated by  
485 *Enterococcus* sp. *Frontiers in Microbiology* 7:1005.
- 486 52. Kozich JJ, Westcott SL, Baxter NT, Highlander SK, Schloss PD. 2013. Development of a  
487 dual-index sequencing strategy and curation pipeline for analyzing amplicon  
488 sequence data on the MiSeq Illumina sequencing platform. *Applied Environmental*

- 489           Microbiology 79:5112-20.
- 490   53. Andrews S. 2013. FastQC: a quality control tool for high throughput sequence data.  
491           Available online at: <http://www.bioinformatics.babraham.ac.uk/projects/fastqc>.
- 492   54. Bolger AM, Lohse M, Usadel B. 2014. Trimmomatic: a flexible trimmer for Illumina  
493           sequence data. *Bioinformatics* 30:2114-20.
- 494   55. Magoc T, Salzberg SL. 2011. FLASH: fast length adjustment of short reads to improve  
495           genome assemblies. *Bioinformatics* 27:2957-63.
- 496   56. Edgar RC. 2013. UPARSE: highly accurate OTU sequences from microbial amplicon reads.  
497           *Nature Methods* 10:996-338.
- 498   57. Edgar RC. 2010. Search and clustering orders of magnitude faster than BLAST.  
499           *Bioinformatics* 26:2460-1.
- 500   58. Wang Q, Garrity GM, Tiedje JM, Cole JR. 2007. Naive Bayesian classifier for rapid  
501           assignment of rRNA sequences into the new bacterial taxonomy. *Applied and*  
502           *Environmental Microbiology* 73:5261-7.
- 503   59. Yilmaz P, Parfrey LW, Yarza P, Gerken J, Pruesse E, Quast C, Schweer T, Peplies J, Ludwig W,  
504           Glockner FO. 2014. The SILVA and "All-species Living Tree Project (LTP)" taxonomic  
505           frameworks. *Nucleic Acids Research* 42:D643-8.
- 506   60. Schloss PD, Westcott SL, Ryabin T, Hall JR, Hartmann M, Hollister EB, Lesniewski RA,  
507           Oakley BB, Parks DH, Robinson CJ, Sahl JW, Stres B, Thallinger GG, Van Horn DJ,  
508           Weber CF. 2009. Introducing mothur: open-source, platform-independent,  
509           community-supported software for describing and comparing microbial communities.  
510           *Applied and Environmental Microbiology* 75:7537-41.
- 511   61. Caporaso JG, Kuczynski J, Stombaugh J, Bittinger K, Bushman FD, Costello EK, Fierer N,  
512           Pena AG, Goodrich JK, Gordon JI, Huttley GA, Kelley ST, Knights D, Koenig JE, Ley RE,  
513           Lozupone CA, McDonald D, Muegge BD, Pirrung M, Reeder J, Sevinsky JR, Turnbaugh  
514           PJ, Walters WA, Widmann J, Yatsunenko T, Zaneveld J, Knight R. 2010. QIIME allows  
515           analysis of high-throughput community sequencing data. *Nature Methods* 7:335-336.
- 516   62. Langille MGI, Zaneveld J, Caporaso JG, McDonald D, Knights D, Reyes JA, Clemente JC,  
517           Burkepile DE, Thurber RLV, Knight R, Beiko RG, Huttenhower C. 2013. Predictive  
518           functional profiling of microbial communities using 16S rRNA marker gene sequences.  
519           *Nature Biotechnology* 31:814-821.
- 520   63. DeSantis TZ, Hugenholtz P, Larsen N, Rojas M, Brodie EL, Keller K, Huber T, Dalevi D, Hu P,  
521           Andersen GL. 2006. Greengenes, a chimera-checked 16S rRNA gene database and  
522           workbench compatible with ARB. *Applied and Environmental Microbiology*  
523           72:5069-5072.
- 524   64. Huerta-Cepas J, Szklarczyk D, Heller D, Hernandez-Plaza A, Forslund SK, Cook H, Mende  
525           DR, Letunic I, Rattei T, Jensen LJ, von Mering C, Bork P. 2019. eggNOG 5.0: a  
526           hierarchical, functionally and phylogenetically annotated orthology resource based

- 527           on 5090 organisms and 2502 viruses. *Nucleic Acids Research* 47:D309-D314.
- 528   65. Kanehisa M, Goto S. 2000. KEGG: kyoto encyclopedia of genes and genomes. *Nucleic*
- 529           *Acids Research* 28:27-30.
- 530   66. Aßhauer KP, Wemheuer B, Daniel R, Meinicke P. 2015. Tax4Fun: predicting functional
- 531           profiles from metagenomic 16S rRNA data. *Bioinformatics* 31:2882-2884.
- 532

533 **Table 1** Enrichment of KEGG pathways for gut bacterial microbiota of the peach fruit moth (PFM) *Carposina sasakii* and the oriental fruit moth  
 534 (OFM) *Grapholita molesta*.

| Pathway level 1                      | Pathway level 2                             | PFM           | OFM           |
|--------------------------------------|---------------------------------------------|---------------|---------------|
| Metabolism                           | <b>Amino acid metabolism</b>                | <b>9.20%</b>  | <b>5.21%</b>  |
| Metabolism                           | <b>Amino acid metabolism</b>                | <b>9.11%</b>  | <b>6.77%</b>  |
| Metabolism                           | <b>Amino acid metabolism</b>                | <b>8.55%</b>  | <b>13.67%</b> |
| Metabolism                           | <b>Amino acid metabolism</b>                | <b>8.37%</b>  | <b>11.61%</b> |
| Metabolism                           | <b>Amino acid metabolism</b>                | <b>8.15%</b>  | <b>6.81%</b>  |
| Metabolism                           | Lipid metabolism                            | 2.92%         | 3.63%         |
| Metabolism                           | Glycan biosynthesis and metabolism          | 2.47%         | 2.45%         |
| Metabolism                           | Metabolism of terpenoids and polyketides    | 2.43%         | 2.94%         |
| Metabolism                           | Metabolism of other amino acids             | 2.31%         | 2.69%         |
| Metabolism                           | Xenobiotics biodegradation and metabolism   | 1.55%         | 3.86%         |
| Metabolism                           | Biosynthesis of other secondary metabolites | 0.28%         | 0.80%         |
| Genetic Information Processing       | <b>Translation</b>                          | <b>11.62%</b> | 4.22%         |
| Genetic Information Processing       | Replication and repair                      | 8.15%         | 4.10%         |
| Genetic Information Processing       | Folding, sorting and degradation            | 4.24%         | 2.29%         |
| Genetic Information Processing       | Transcription                               | 0.58%         | 0.20%         |
| Environmental Information Processing | <b>Membrane transport</b>                   | <b>10.24%</b> | <b>11.32%</b> |
| Environmental Information Processing | Signal transduction                         | 2.86%         | <b>8.70%</b>  |
| Cellular Processes                   | Cell growth and death                       | 2.83%         | 1.67%         |
| Cellular Processes                   | Cell motility                               | 0.36%         | 2.63%         |
| Cellular Processes                   | Transport and catabolism                    | 0.24%         | 0.26%         |
| Cellular Processes                   | Cellular community - prokaryotes            | 0.09%         | 0.67%         |

535 The percentage is the proportion of the abundance of a pathway in the abundance of all pathways level 2. The top pathways at level 2 in each  
 536 species as well as their proportion were bolded.

537

538 **Table 2** Samples of the peach fruit moth (PFM) *Carposina sasakii* and the oriental fruit moth (OFM) *Grapholita molesta* used in the study

| Code | Species | Collecting location                | Host             | Coordinate        | NO. |
|------|---------|------------------------------------|------------------|-------------------|-----|
| PKPR | PFM     | Kaosanji of Pinggu district (K)    | Pear (PR)        | 40°12'N, 117°19'E | 5   |
| OKPR | OFM     |                                    |                  |                   | 5   |
| PLPR | PFM     | Lvfulong of Yanqing district (L)   | Pear (PR)        | 40°32'N, 116°4'E  | 5   |
| OLPR | OFM     |                                    |                  |                   | 7   |
| PGAE | PFM     | Liugou of Yanqing district (G)     | Apple (AE)       | 40°27'N, 116°6'E  | 4   |
| OGAE | OFM     |                                    |                  |                   | 6   |
| PDAE | PFM     | Dafengying of Yanqing district (D) | Apple (AE)       | 40°26'N, 115°54'E | 5   |
| OYPH | OFM     | Linguosuo of Haidian district (Y)  | Peach shoot (PH) | 39°58'N, 116°13'E | 5   |
| OSPH | OFM     | Shuangxin of Haidian district (S)  | Peach shoot (PH) | 39°57'N, 116°12'E | 2   |

539 All samples were collected from the Beijing area, China. NO., the number of individuals used for 16S rRNA gene sequencing.

540



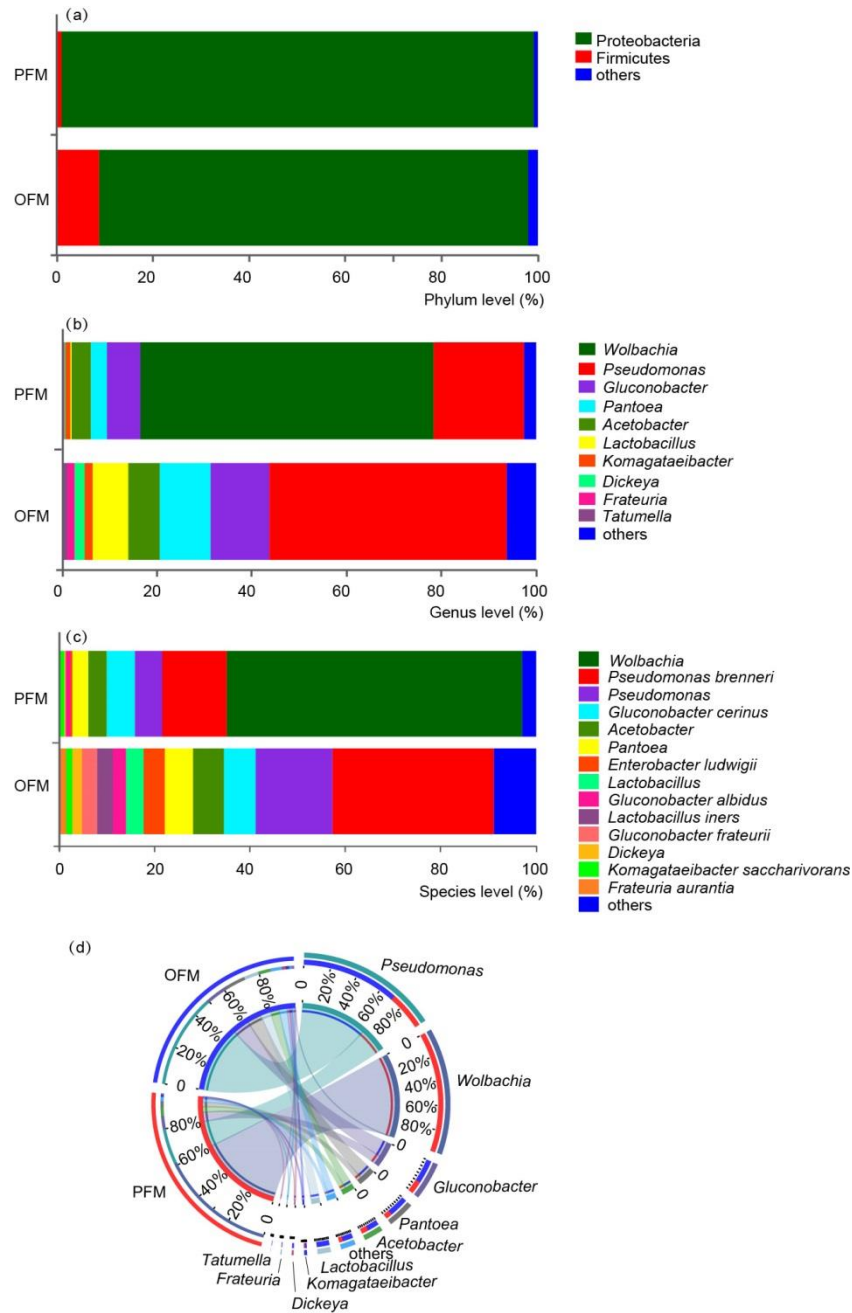

541

542 **Fig. 1** Microbial composition identified in the peach fruit moth (PFM) *Carposina sasakii* and

543 the oriental fruit moth (OFM) *Grapholita molesta*. Community composition of the

544 microbiome on phylum (a), genus (b), and species (c) levels for the OFM and PFM. (d) The

545 cooccurrence relation graph describes the abundance of correspondence between samples

546 and species. Each unit was represented by one color.

547

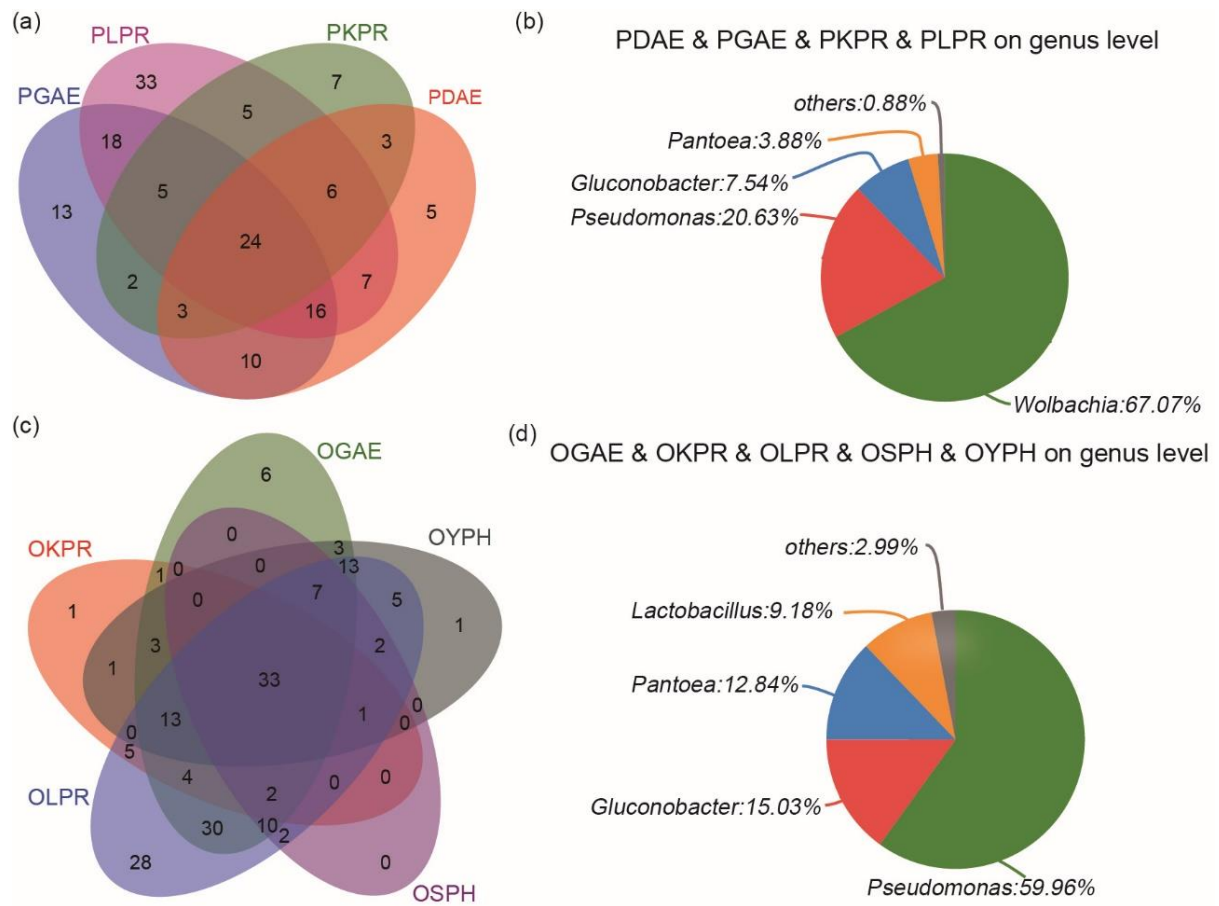

548

549 **Fig. 2** Core bacteria of the same species from different hosts and different orchards. (a) Venn

550 diagram at the genus level of PFM in four orchards. (b) Composition of 24 core genera found

551 in all four orchard samples. (c) Venn diagram at the genus level of OFM from 5 orchards. (d)

552 Composition of 33 core genera found in all five orchard samples. See Table 1 for the codes.

553

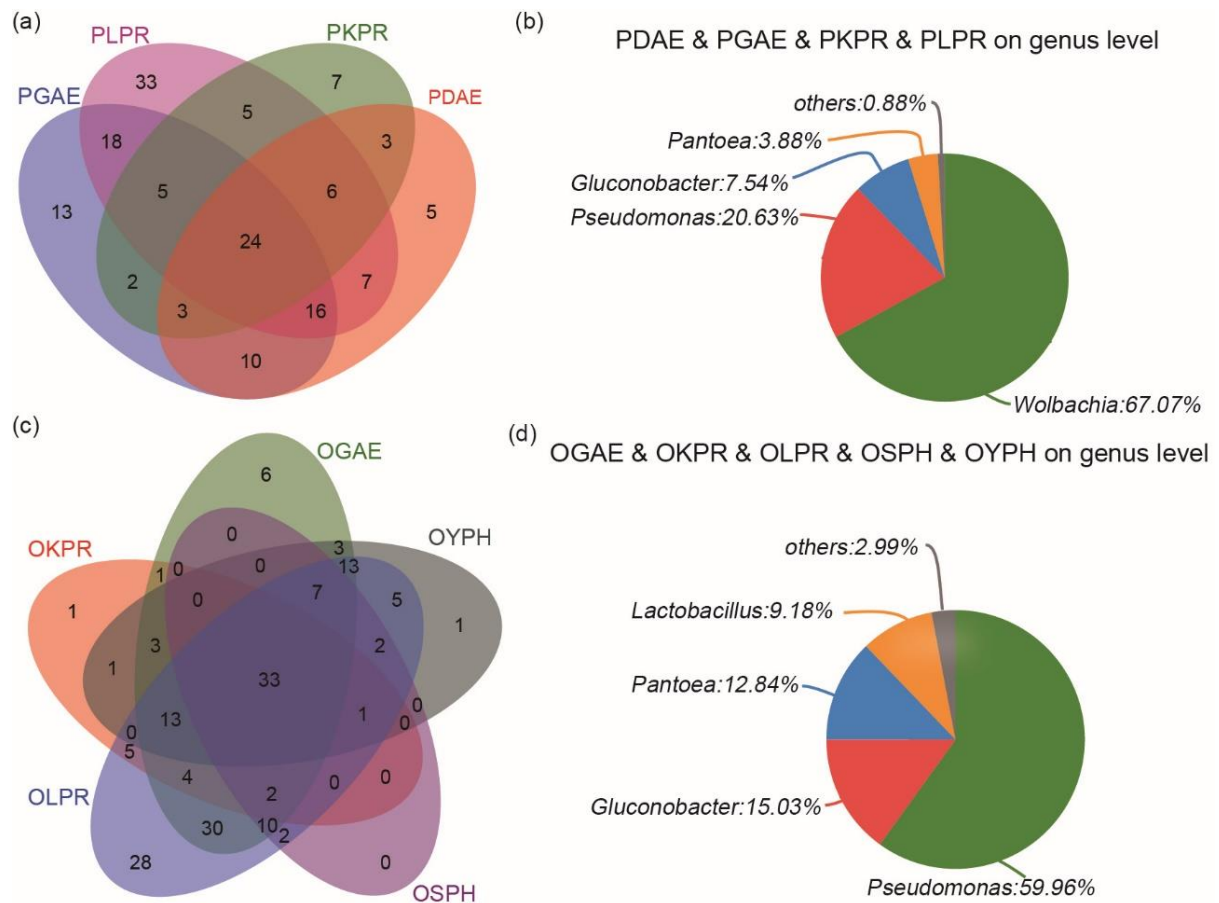

554

555 **Fig. 3** Comparison of gut bacterial microbiota between the peach fruit moth (PFM)

556 *Carposina sasakii* and the oriental fruit moth (OFM) *Grapholita molesta* individuals for alpha

557 and beta diversity. (a and c) Community richness and diversity by Ace and Shannon index for

558 the OTU level between the two species. (b and d) Wilcoxon rank-sum test of the difference

559 between OFM and PFM individuals for ACE and Shannon indices ( $p > 0.05$  is marked as NA,

560  $0.01 < p \leq 0.05$  is marked as \*,  $0.001 < p \leq 0.01$  is marked as \*\*, and  $p \leq 0.001$  is marked as

561 \*\*\*). (e) Beta diversity of the microbiome between two species estimated by PCoA analysis

562 at the genus level. PCo1 and PCo2 are the first two principle components, while the values

563 on the x- and y-axis are proportions explained by corresponding components, respectively

564 (PERMANOVA test with 999 permutations,  $p = 0.001$ , see Table S5 for values).

565

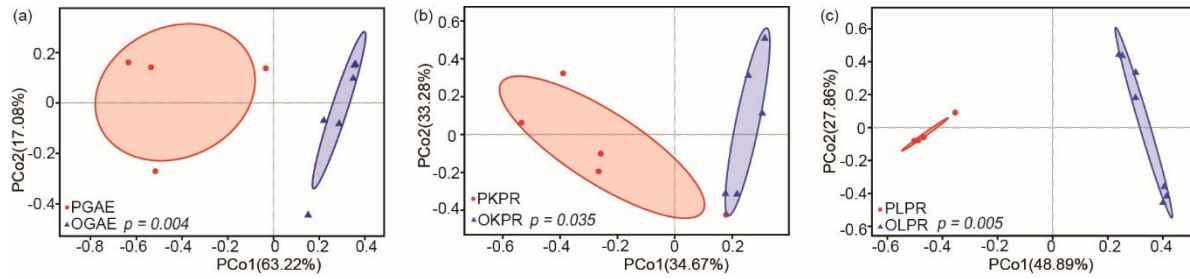

566

567 **Fig. 4** Beta diversity of gut bacterial microbiota between the peach fruit moth (PFM)

568 *Carposina sasakii* and the oriental fruit moth (OFM) *Grapholita molesta* from the same host

569 plant and orchard. PERMANOVA was performed to determine the differences among groups.

570 (a) Sampled were collected from apple orchard estimated by PCoA analysis on the genus

571 level. (b) Sampled were collected from pear orchard. (c) Sampled were collected from

572 another orchard of pear (PERMANOVA test with 999 permutations, see Table S5 for values).

573

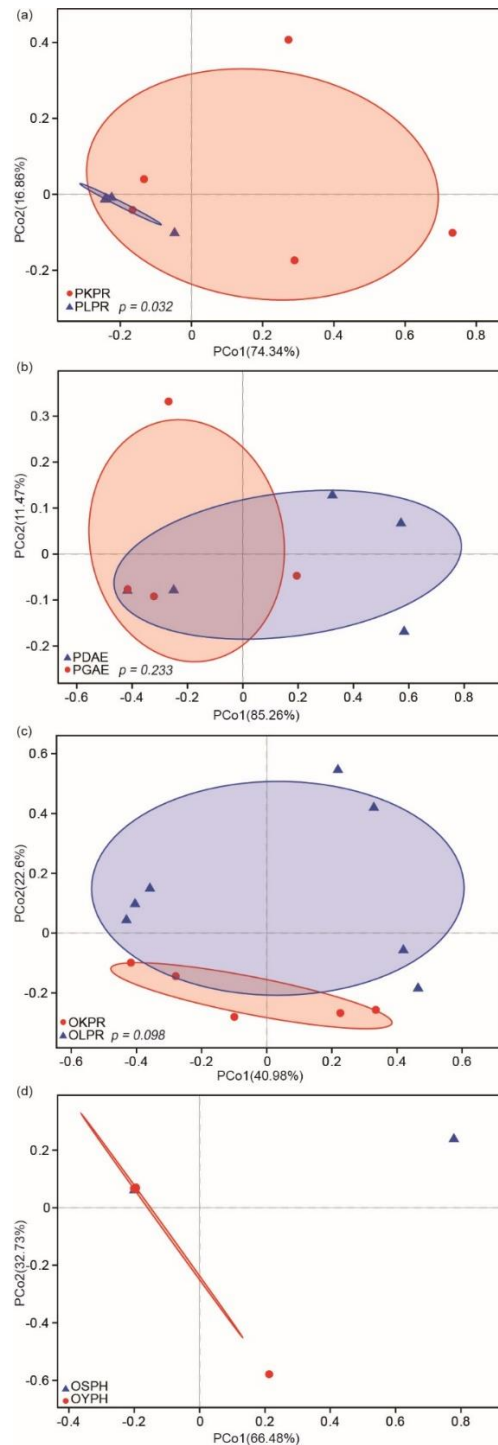

574

575 **Fig. 5** Effects of environmental differences on beta diversity of gut microbiota in the peach

576 fruit moth (PFM) *Carposina sasakii* and the oriental fruit moth (OFM) *Grapholita molesta*

577 between different orchards in the same insect species and the same host species

578 (PERMANOVA test with 999 permutations, Table S6).

579

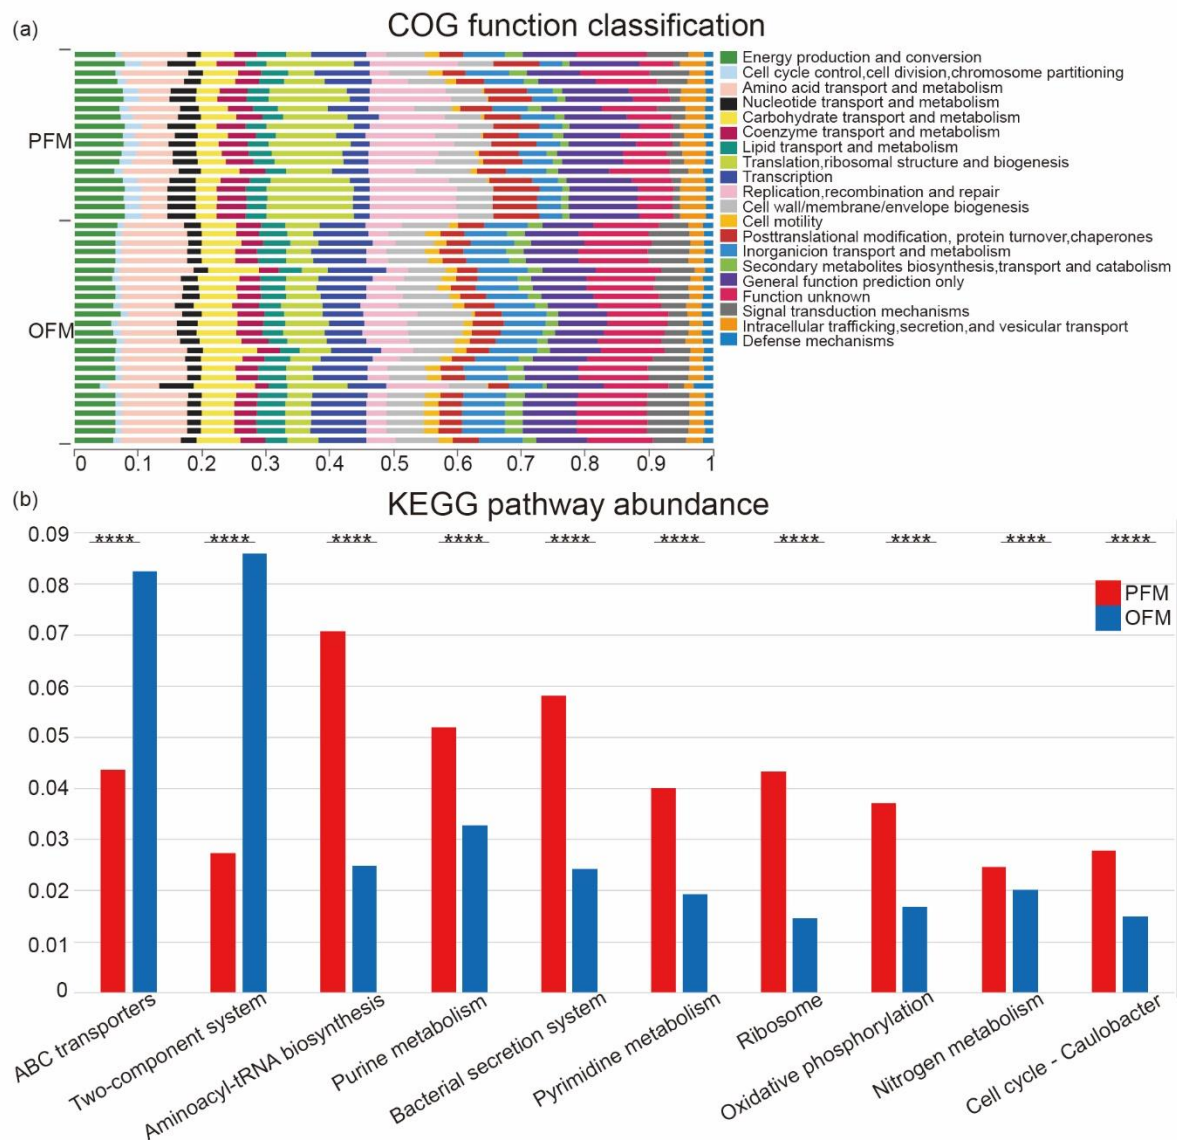

580

581 **Fig. 6** Functional predictions of gut microbiota in the peach fruit moth (PFM) *Carposina*

582 *sasakii* and the oriental fruit moth (OFM) *Grapholita molesta*. (a) COG function classification;

583 (b) KEGG pathway abundance of top 10 KEGG pathways at level 3 and the statistical

584 difference between PFM and OFM ( $p \leq 0.0001$  is marked as \*\*\*\*).
